# Supplementary material for: Effect of dendrimer generation and surface groups on the optoelectronic properties of green emitting bis-tridentate iridium(iii) complexes designed for OLEDs
Source: Royal Society of Chemistry journal article supplement (doi:10.1039/d3tc01798b), 2023-01-01
Supplement: d3tc01798b1.pdf [file d3tc01798b1.pdf]

### Supplementary information

#### Effect of dendrimer generation and surface groups on the optoelectronic properties of green emitting bis-tridentate iridium(III) complexes designed for OLEDs

Vaidehi Pandit, Junhyuk Jang, Manikandan Koodalingam, Chandana Sampath Kumara Ranasinghe, Mile Gao, Paul L. Burn\*, Emma V. Puttock

Centre for Organic Photonics & Electronics (COPE), School of Chemistry & Molecular Biosciences, University of Queensland, St. Lucia, QLD, 4072, Australia

\*p.burn2@uq.edu.au

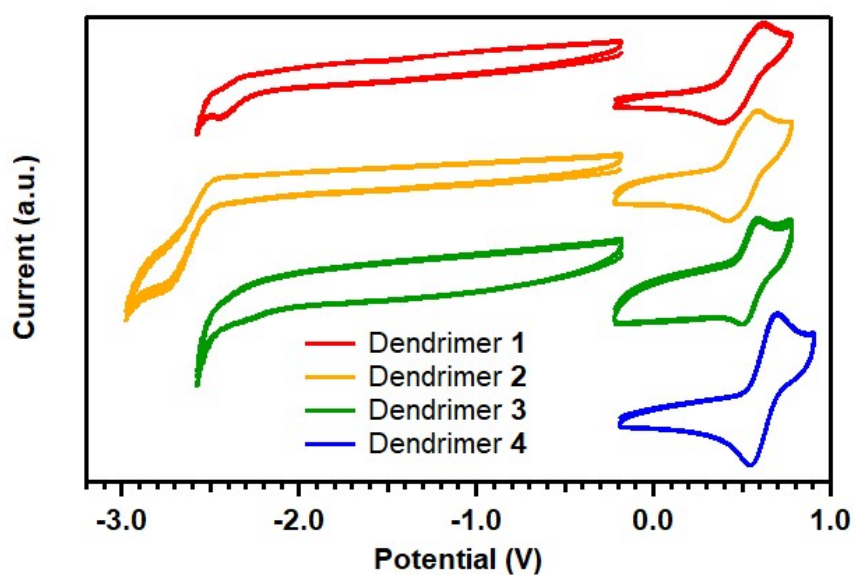

Fig. S1. Cyclic Voltammograms of dendrimers 1, 2, 3 and 4 in dichloromethane (oxidations) and tetrahydrofuran (reductions) in the presence of 0.1 M tetra-*n*-butylammonium perchlorate at room temperature.

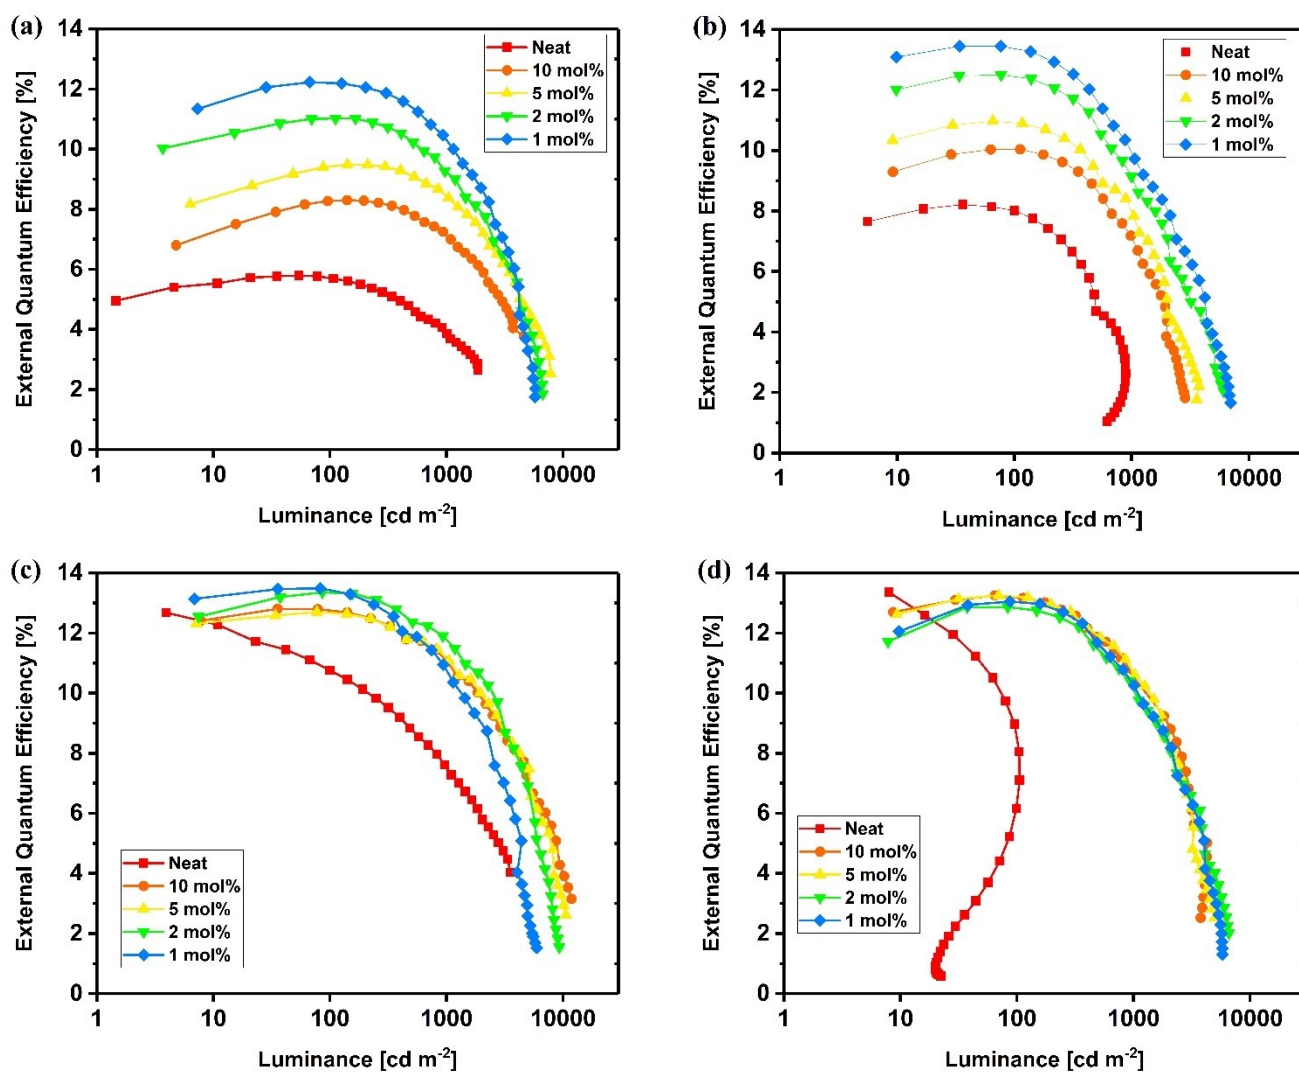

Fig. S2. EQE versus Luminance with various blend concentrations for devices incorporating dendrimer 1 (a), 2 (b), 3 (c) and 4 (d).

Table S1. Photophysical properties of dendrimers 1, 2, 3 and 4 films (2 mol% in TCTA) at  $298 \pm 3$  K

| Sample      | TCTA PL (%) | TCTA PLQY | Emitter PL (%) | Emitter PLQY |
|-------------|-------------|-----------|----------------|--------------|
| Dendrimer 1 | 8           | 4.6       | 92             | 58.0         |
| Dendrimer 2 | 8           | 4.6       | 92             | 54.2         |
| Dendrimer 3 | 26          | 11.9      | 74             | 33.4         |
| Dendrimer 4 | 10          | 5.5       | 90             | 49.3         |

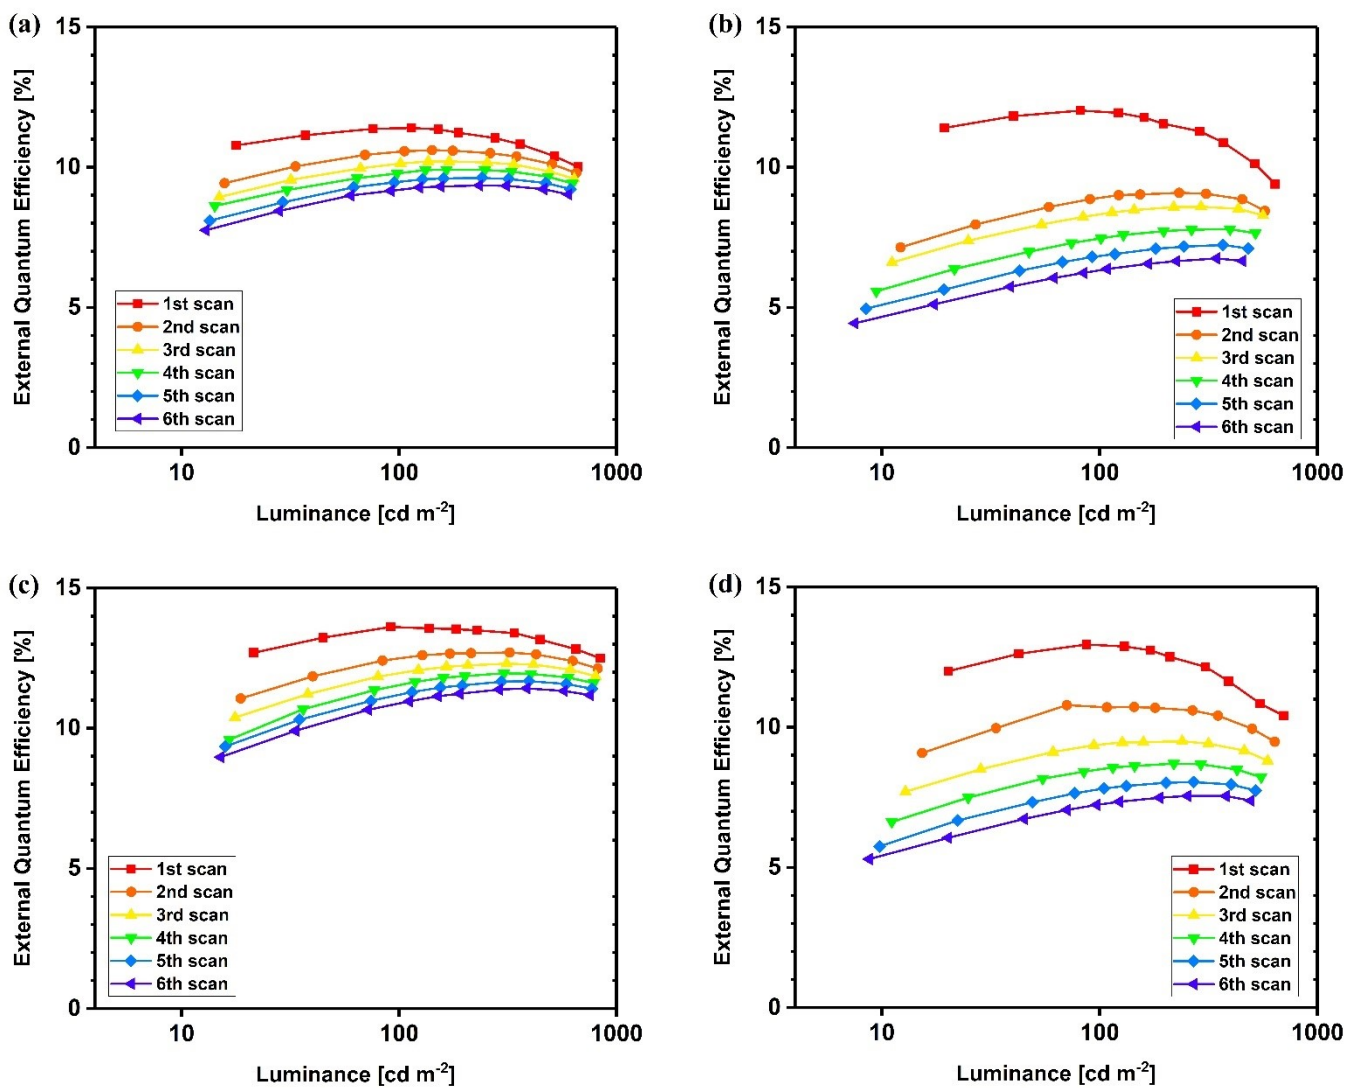

Fig. S3. Changing EQE vs. Luminance curves as a function of electrical stress of (a) Dendrimer 1 (b) Dendrimer 2 (c) Dendrimer 3 (d) Dendrimer 4 blended in TCTA 2 mol%.

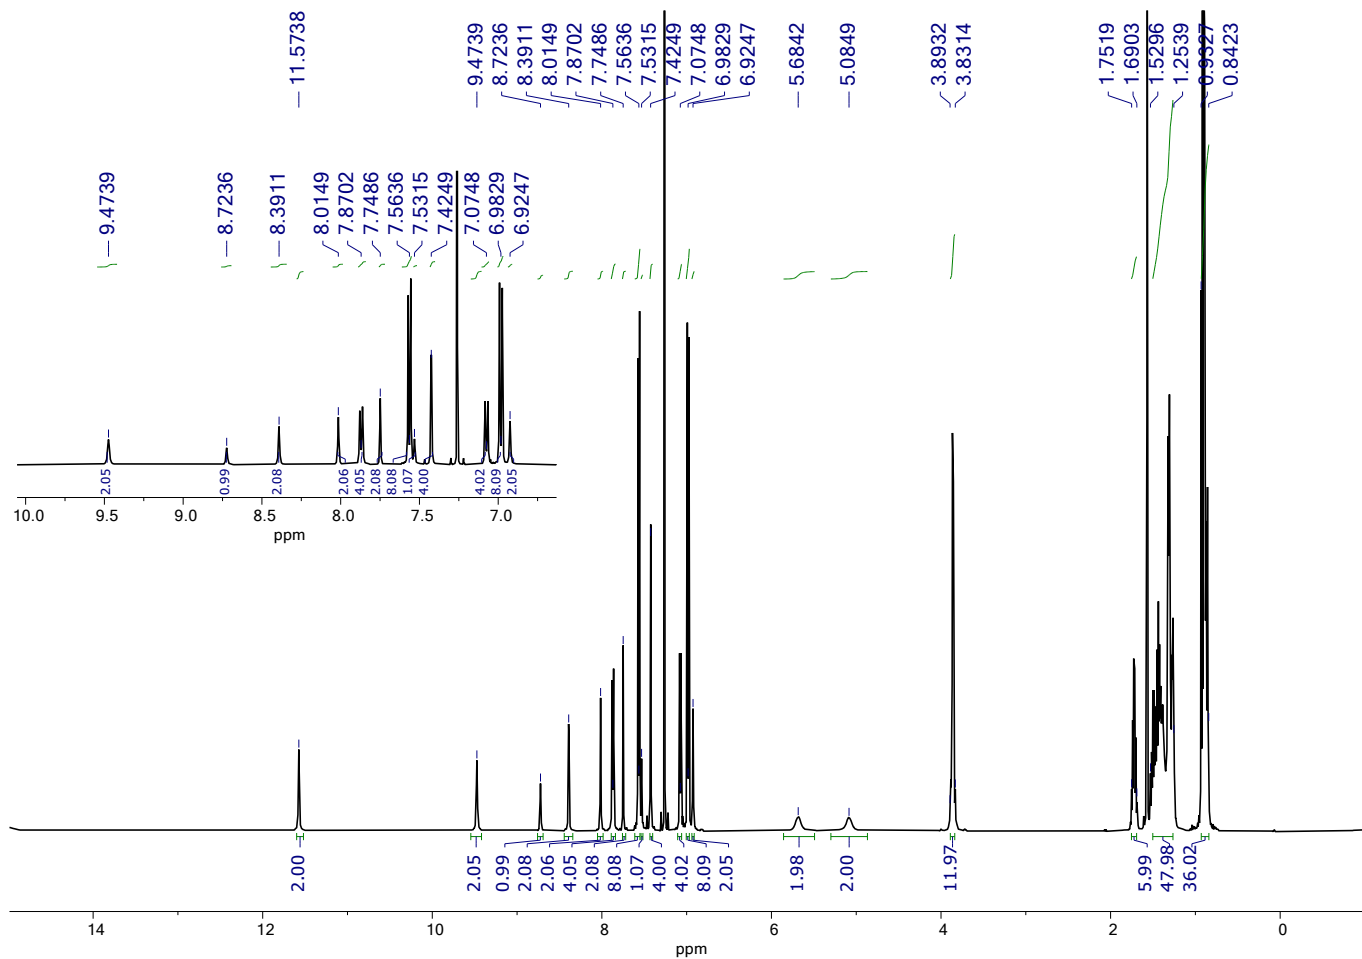

Fig S4.  $^1\text{H}$  NMR of Compound 4 in  $\text{CDCl}_3$ .

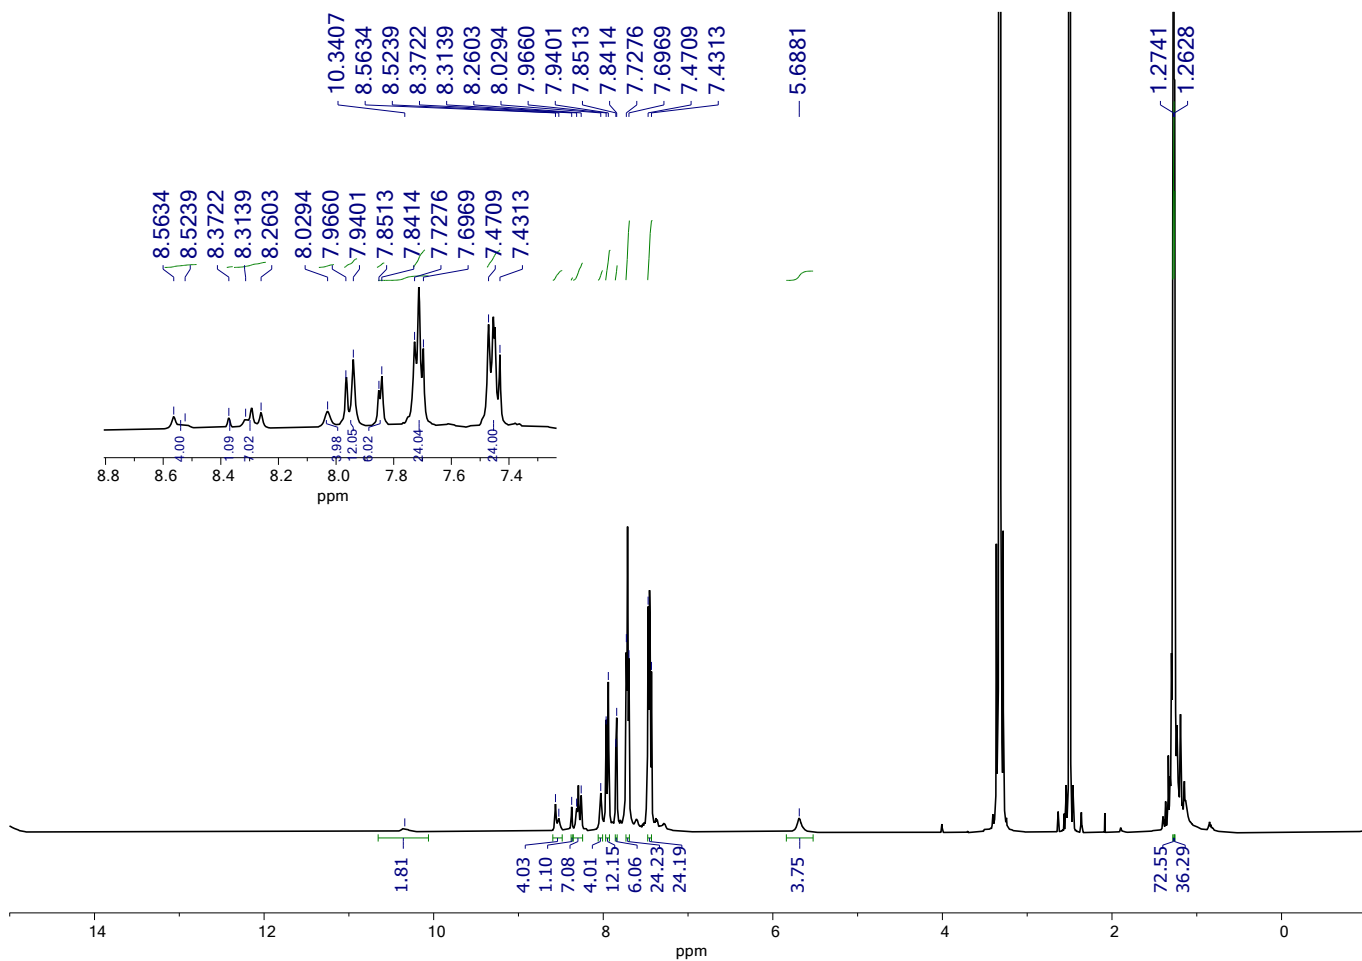

Fig. S5.  $^1\text{H}$  NMR of Compound 15 in  $\text{DMSO}-d_6$ .

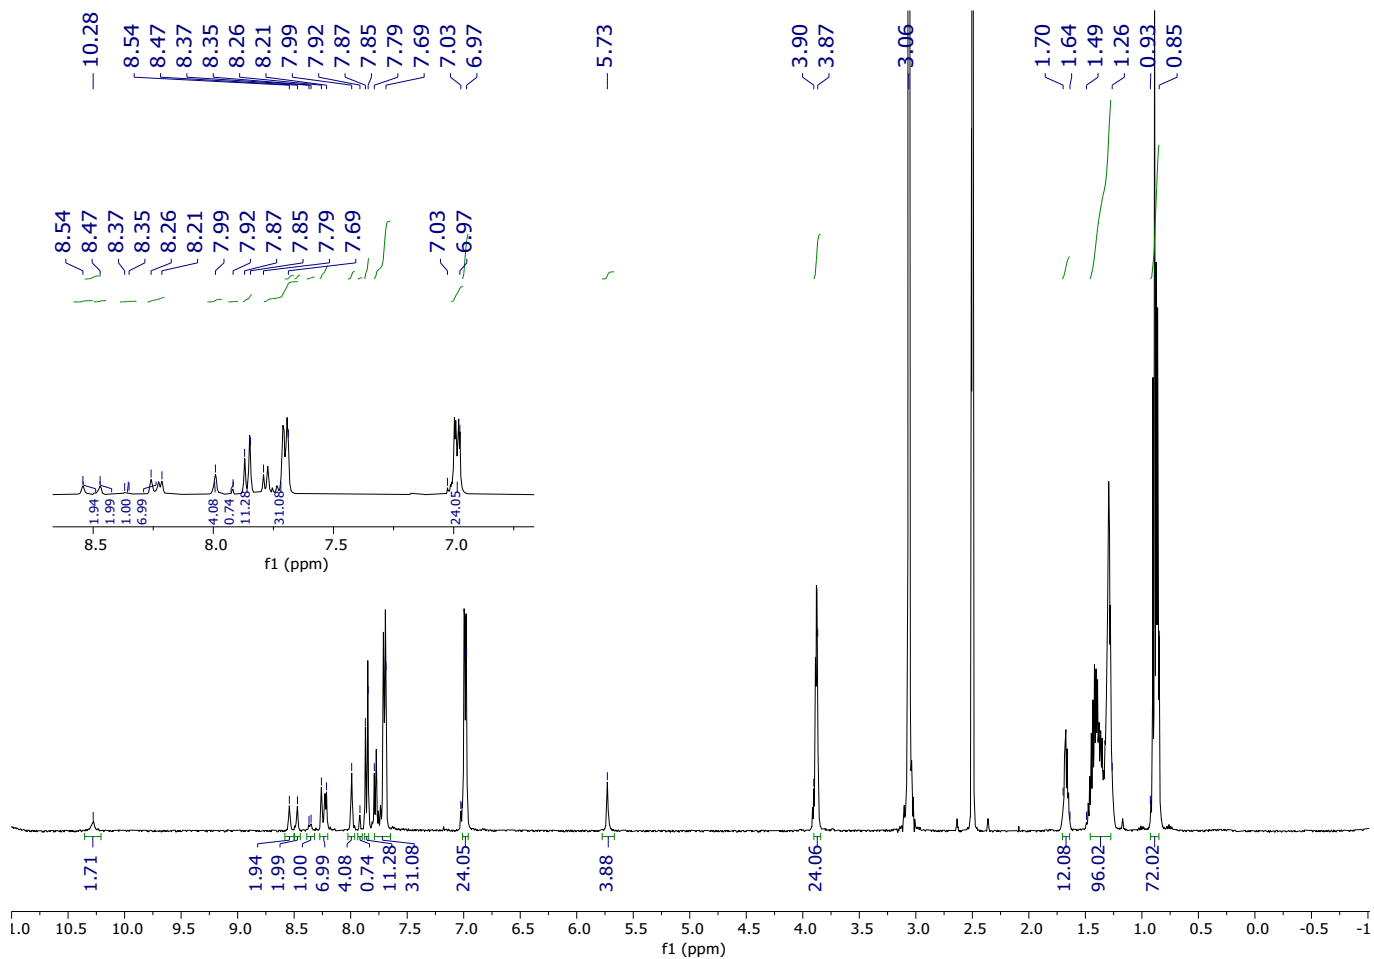

Fig. S6.  $^1\text{H}$  NMR of Compound **21** in  $\text{DMSO-}d_6$ .

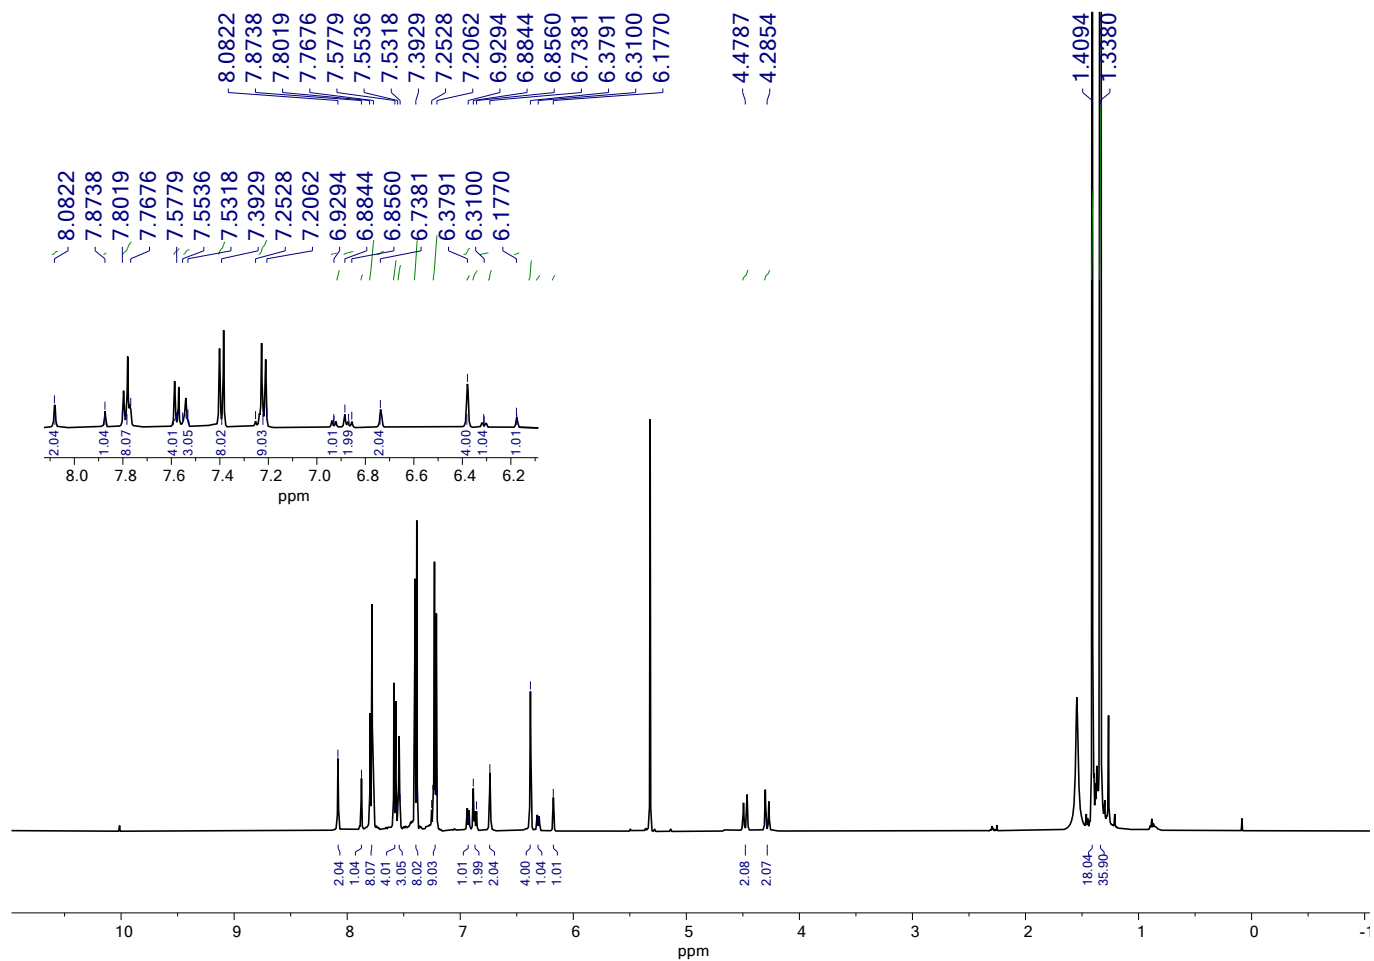

Fig. S7.  $^1\text{H}$  NMR of Dendrimer **1** in  $\text{CD}_2\text{Cl}_2$ .

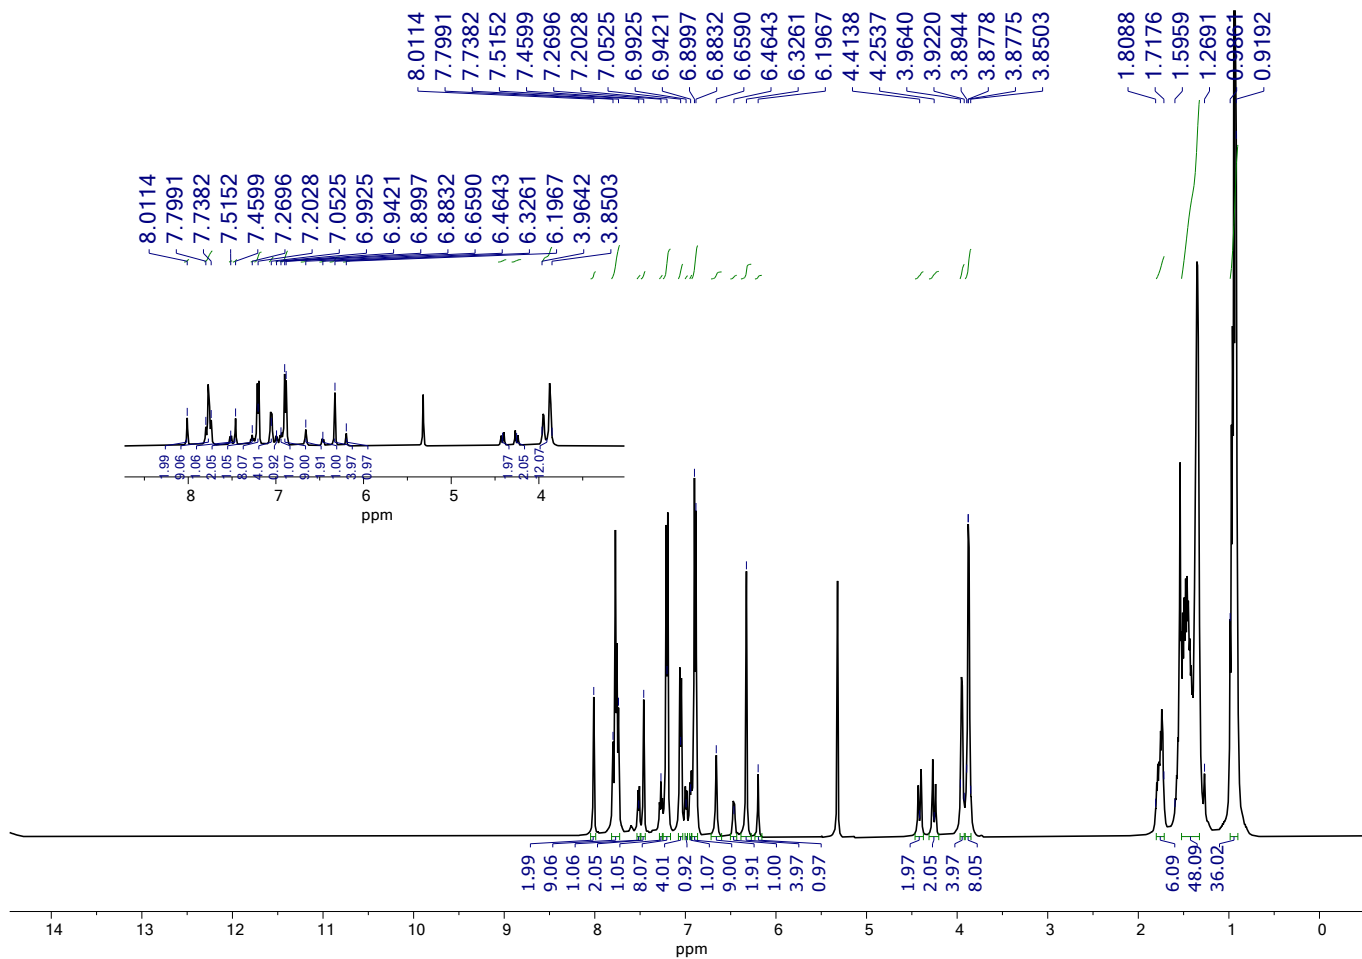

Fig. S8.  $^1\text{H}$  NMR of Dendrimer 2 in  $\text{CD}_2\text{Cl}_2$ .

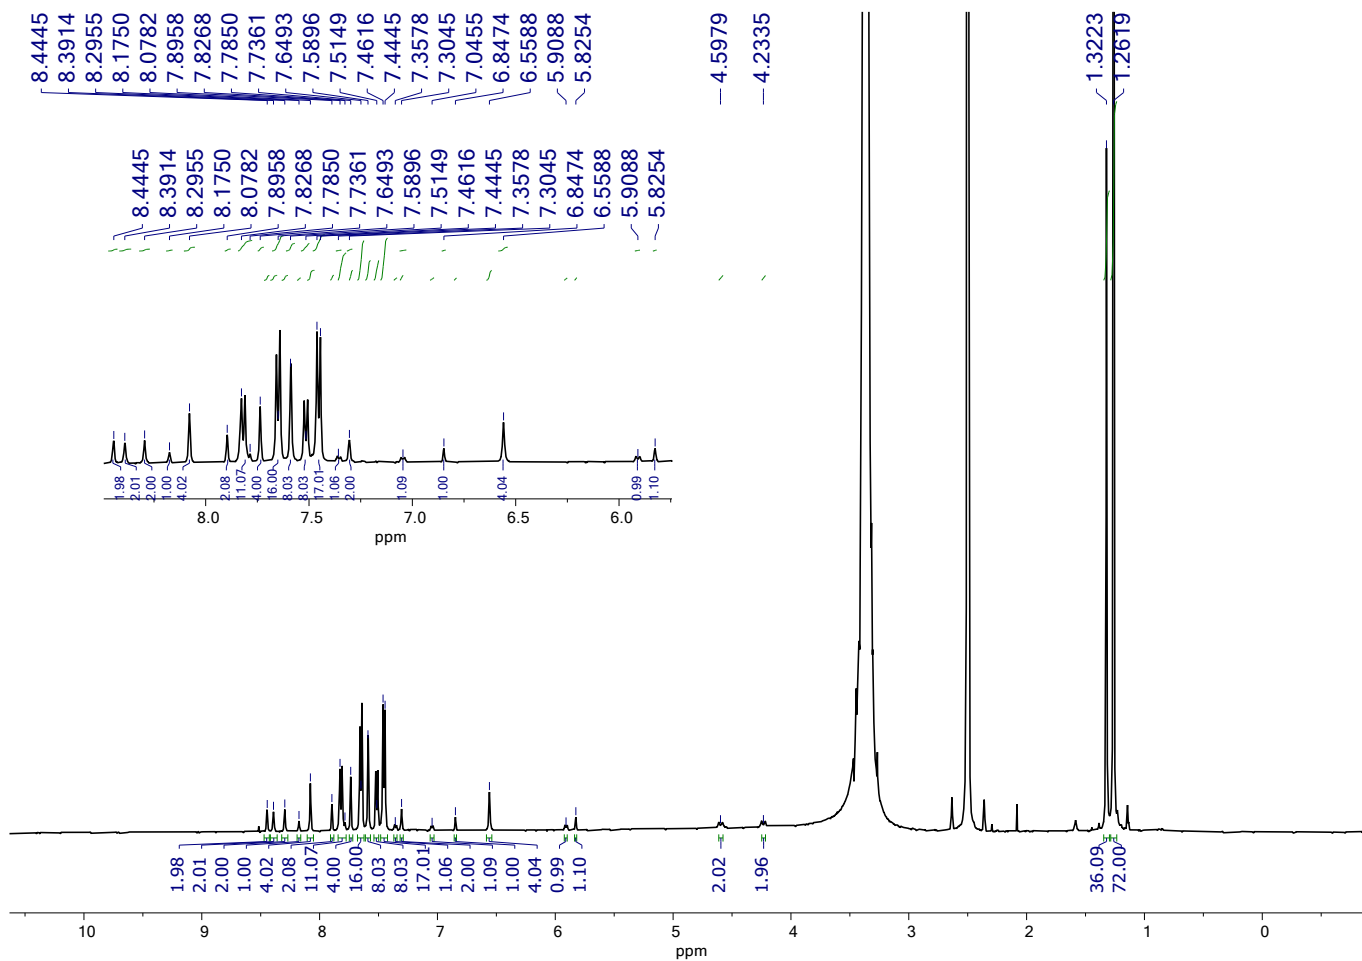

Fig. S9.  $^1\text{H}$  NMR of Dendrimer 3 in  $\text{DMSO}-d_6$ .

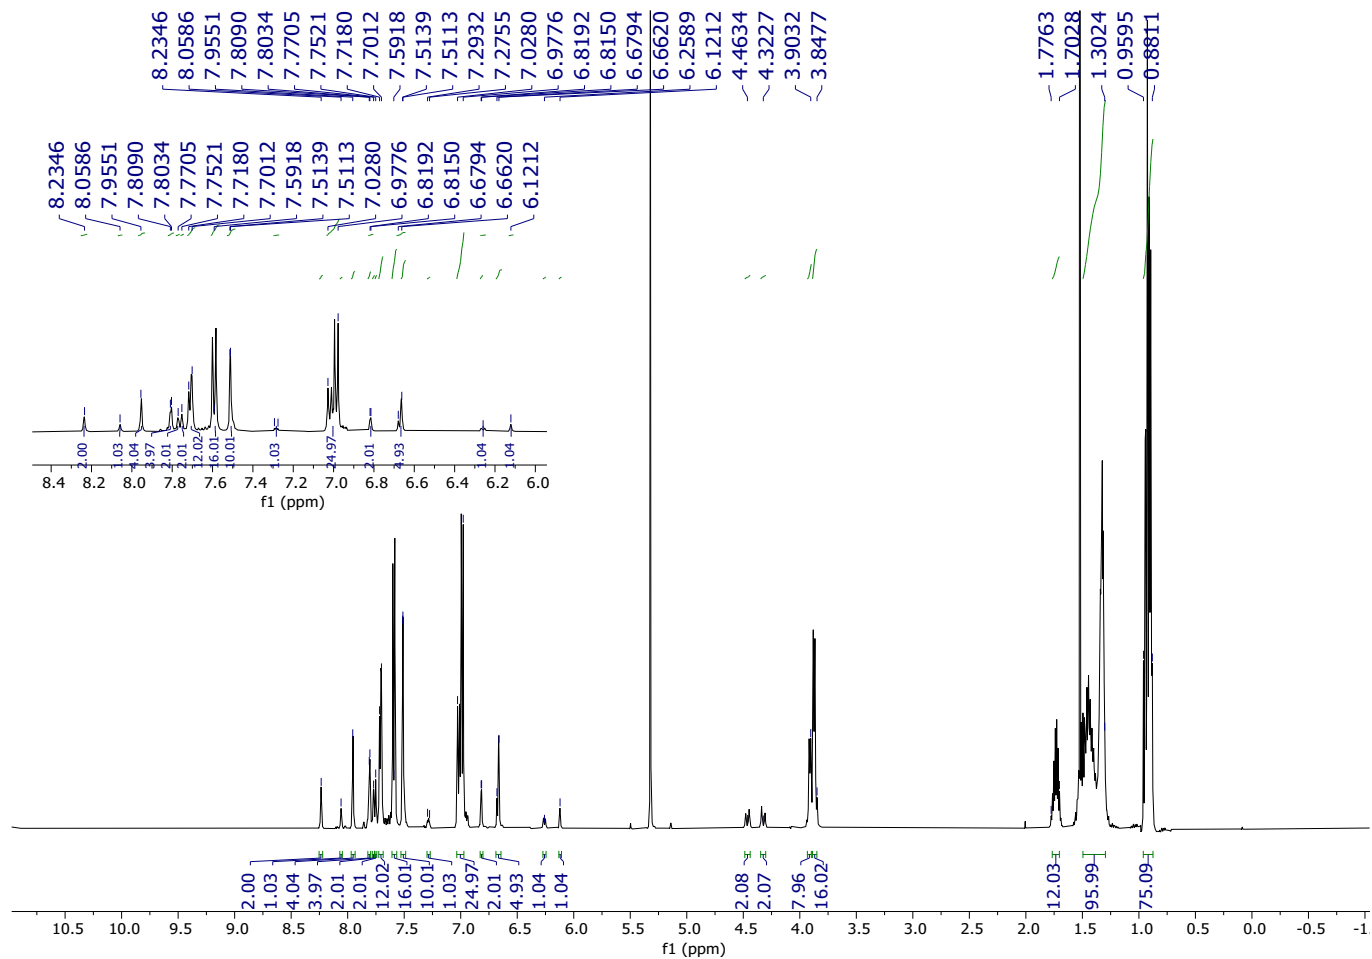

Fig. S10.  $^1\text{H}$  NMR of Dendrimer 4 in  $\text{CD}_2\text{Cl}_2$ .
